# Supplementary material
Source: Springer Nature journal article supplement (https://www.springermedizin.de/resource/supplementary/12936_2011_1814_MOESM5_ESM.pdf/9541798)

EIR

900  
800  
700  
600  
500  
400  
300  
200  
100  
0

Nov.

Dec.

Jan.

Feb.

May

Jun.

Jul.

Aug.

Dry

Wet

Month

Impact

Non Impact

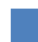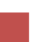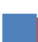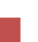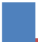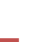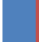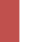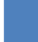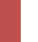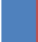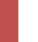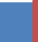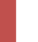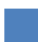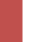

Supplement: MOESM5 [file 9541798]
